# Supplementary material for: In Vitro Culture of Rosmarinus officinalis L. in a Temporary Immersion System: Influence of Two Phytohormones on Plant Growth and Carnosol Production
Source: MDPI journal article supplement (doi:10.3390/ph14080747), 2021-07-29
Supplement: s1 [file s1]

*In vitro* Culture of *Rosmarinus Officinalis* L. in a Temporary Immersion System:  
Influence of two Phytohormones on Plant Growth and Carnosol Production

Eder Villegas Sánchez, Mariana Macías-Alonso, Soraya Osegueda Robles, Lisset Herrera-Isidró,  
Hector Nuñez-Palenius & Joaquín G. Marrero.

## Supplementary information

### Table of contents

|                                   |    |
|-----------------------------------|----|
| - General Experimental Procedures | S2 |
| - Plant Material                  | S2 |
| - Figure S1.                      | S2 |
| - Figure S2.                      | S2 |
| - Table S1.                       | S3 |
| - Table S2.                       | S3 |
| - Table S3.                       | S4 |
| - Figure S3.                      | S5 |
| - Figure S4.                      | S5 |
| - Figure S5.                      | S6 |
| - Table S4.                       | S6 |
| - Table S5.                       | S7 |
| - Figure S6.                      | S7 |
| - Figure S6.                      | S8 |

### General Experimental Procedures

All solvents and reagents used in this work were purchased from Sigma-Aldrich Co. and used without further purification. Carnosol standard was procured from Sigma-Aldrich. Analytical thin-layer chromatography (TLC) were carried out on precoated silica gel 60F254 aluminium base plates with a 230-400 mesh particle size (20 x 20 cm) (Merck), using a combination of dichloromethane ( $\text{Cl}_2\text{CH}_2$ ) and acetone ( $\text{Me}_2\text{CO}$ ) as an eluent, in proportion 95:5. In all cases, the TLC plates were visualized by exposure to ultra violet light, and then the spots were revealed by spraying with oleum (80% acetic acid, 16% water, 4% sulphuric acid) and heating at 120 °C for 15 minutes.

### Plant Material

Wild plants were collected in the ethnobotanical garden Francisco Peláez Roldán, located at street 2 South 1700 in the city of San Andrés Cholula, Puebla, and a specimen of *Rosmarinus officinalis* was deposited in the same ethnobotanical garden.

### Shoots regenerated from nodal explants

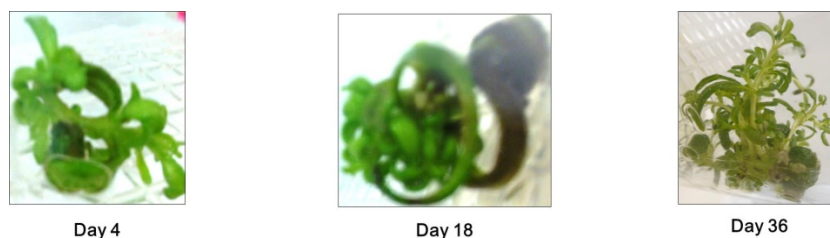

**Figure S1.** Effects of 5 mg L<sup>-1</sup> 6-BAP on induction of shoots from explants of *R. officinalis* L.

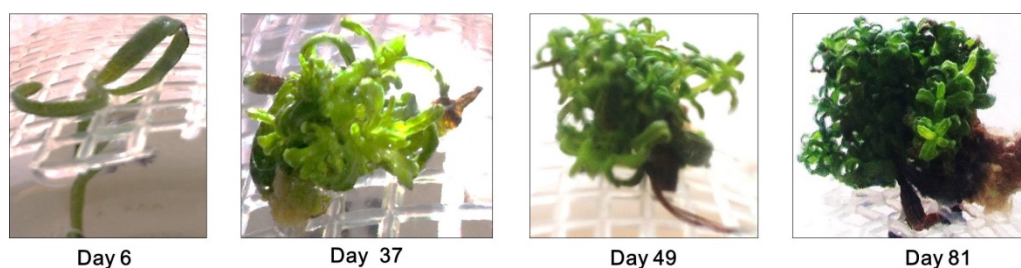

**Figure S2.** Effects of 5 mg L<sup>-1</sup> 6-BAP with an immersion cycle of 1 min every 12 h on induction of shoots from explants of *R. officinalis* L.

**Table S1.** Solid culture system and plant growth regulator effects on shoot number in *R. officinalis*.

| Plant growth regulator |    | 6-BAP |    |      |       |          |     |    |      |       |          |     |     |      |        |          |     | NAA |      |        |          |     |     |      |        |          |     |     |      |        |          |  |  |
|------------------------|----|-------|----|------|-------|----------|-----|----|------|-------|----------|-----|-----|------|--------|----------|-----|-----|------|--------|----------|-----|-----|------|--------|----------|-----|-----|------|--------|----------|--|--|
| Concentration (mg/L)   |    | 0.2   |    |      |       |          | 2.5 |    |      |       |          | 5   |     |      |        |          | 0.5 |     |      |        |          | 1   |     |      |        |          | 2.5 |     |      |        |          |  |  |
| Day                    |    | 1A    | 1B | 1C   | PROM. | Desv Std | 2A  | 2B | 2C   | PROM. | Desv Std | 3A  | 3B  | 3C   | PROM.  | Desv Std | 4A  | 4B  | 4C   | PROM.  | Desv Std | 5A  | 5B  | 5C   | PROM.  | Desv Std | 6A  | 6B  | 6C   | PROM.  | Desv Std |  |  |
| % Contamination        | 0  | 0     | 0  | 0    | 0.00  | 0.00     | 0   | 0  | 0    | 0.00  | 0.00     | 0   | 0   | 0    | 0.00   | 0.00     | 0   | 0   | 0    | 0.00   | 0.00     | 0   | 0   | 0    | 0.00   | 0.00     | 0   | 0   | 0    | 0.00   | 0.00     |  |  |
|                        | 4  | 0     | 0  | 0    | 0.00  | 0.00     | 0   | 0  | 0    | 0.00  | 0.00     | 0   | 0   | 0    | 0.00   | 0.00     | 0   | 0   | 0    | 0.00   | 0.00     | 0   | 0   | 0    | 0.00   | 0.00     | 0   | 0   | 0    | 0.00   | 0.00     |  |  |
|                        | 7  | 0     | 0  | 0    | 0.00  | 0.00     | 0   | 0  | 0    | 0.00  | 0.00     | 0   | 0   | 0    | 0.00   | 0.00     | 0   | 0   | 0    | 0.00   | 0.00     | 0   | 0   | 0    | 0.00   | 0.00     | 0   | 0   | 0    | 0.00   | 0.00     |  |  |
|                        | 10 | 0     | 0  | 0    | 0.00  | 0.00     | 0   | 0  | 0    | 0.00  | 0.00     | 0   | 0   | 0    | 0.00   | 0.00     | 0   | 0   | 0    | 0.00   | 0.00     | 0   | 0   | 0    | 0.00   | 0.00     | 0   | 0   | 0    | 0.00   | 0.00     |  |  |
|                        | 17 | 0     | 0  | 0    | 0.00  | 0.00     | 0   | 0  | 0    | 0.00  | 0.00     | 0   | 0   | 0    | 0.00   | 0.00     | 0   | 0   | 0    | 0.00   | 0.00     | 0   | 0   | 0    | 0.00   | 0.00     | 0   | 0   | 0    | 0.00   | 0.00     |  |  |
| 28                     | 0  | 0     | 0  | 0.00 | 0.00  | 0        | 0   | 0  | 0.00 | 0.00  | 0        | 0   | 0   | 0.00 | 0.00   | 0        | 0   | 0   | 0.00 | 0.00   | 0        | 0   | 0   | 0.00 | 0.00   | 0        | 0   | 0   | 0.00 | 0.00   |          |  |  |
| % Necrosis             | 0  | 0     | 0  | 0    | 0.00  | 0.00     | 0   | 0  | 0    | 0.00  | 0.00     | 0   | 0   | 0    | 0.00   | 0.00     | 0   | 0   | 0    | 0.00   | 0.00     | 0   | 0   | 0    | 0.00   | 0.00     | 0   | 0   | 0    | 0.00   | 0.00     |  |  |
|                        | 4  | 15    | 1  | 5    | 7.00  | 7.21     | 40  | 1  | 15   | 18.67 | 19.76    | 0   | 40  | 60   | 33.33  | 30.55    | 5   | 15  | 15   | 11.67  | 5.77     | 10  | 0   | 0    | 3.33   | 5.77     | 40  | 30  | 5    | 25.00  | 18.03    |  |  |
|                        | 7  | 20    | 1  | 10   | 10.33 | 9.50     | 45  | 5  | 15   | 21.67 | 20.82    | 0   | 45  | 60   | 35.00  | 31.22    | 30  | 15  | 15   | 20.00  | 8.66     | 20  | 0   | 10   | 10.00  | 10.00    | 40  | 40  | 15   | 31.67  | 14.43    |  |  |
|                        | 10 | 20    | 1  | 10   | 10.33 | 9.50     | 55  | 10 | 35   | 33.33 | 22.55    | 0   | 75  | 65   | 46.67  | 40.72    | 50  | 60  | 20   | 43.33  | 20.82    | 30  | 0   | 20   | 16.67  | 15.28    | 60  | 40  | 40   | 46.67  | 11.55    |  |  |
|                        | 17 | 28    | 9  | 17   | 18.00 | 9.54     | 70  | 30 | 45   | 48.33 | 20.21    | 100 | 100 | 50   | 83.33  | 28.87    | 85  | 100 | 30   | 71.67  | 36.86    | 85  | 0   | 55   | 46.67  | 43.11    | 100 | 65  | 90   | 85.00  | 18.03    |  |  |
|                        | 28 | 30    | 24 | 17   | 23.67 | 6.51     | 98  | 42 | 48   | 62.67 | 30.75    | 100 | 100 | 100  | 100.00 | 0.00     | 100 | 100 | 100  | 100.00 | 0.00     | 100 | 100 | 100  | 100.00 | 0.00     | 100 | 100 | 100  | 100.00 | 0.00     |  |  |
| No. Callus             | 0  | 2     | 4  | 1    | 2.33  | 1.53     | 0   | 0  | 0    | 0.00  | 0.00     | 0   | 0   | 0    | 0.00   | 0.00     | 0   | 0   | 0    | 0.00   | 0.00     | 0   | 1   | 1    | 0.67   | 0.58     | 0   | 0   | 0    | 0.00   | 0.00     |  |  |
|                        | 4  | 2     | 4  | 1    | 2.33  | 1.53     | 0   | 0  | 0    | 0.00  | 0.00     | 0   | 0   | 0    | 0.00   | 0.00     | 0   | 0   | 0    | 0.00   | 0.00     | 0   | 1   | 1    | 0.67   | 0.58     | 0   | 0   | 0    | 0.00   | 0.00     |  |  |
|                        | 7  | 2     | 4  | 1    | 2.33  | 1.53     | 0   | 0  | 0    | 0.00  | 0.00     | 0   | 0   | 0    | 0.00   | 0.00     | 0   | 0   | 0    | 0.00   | 0.00     | 0   | 1   | 1    | 0.67   | 0.58     | 0   | 0   | 0    | 0.00   | 0.00     |  |  |
|                        | 10 | 2     | 4  | 1    | 2.33  | 1.53     | 0   | 0  | 0    | 0.00  | 0.00     | 0   | 0   | 0    | 0.00   | 0.00     | 0   | 0   | 0    | 0.00   | 0.00     | 0   | 1   | 1    | 0.67   | 0.58     | 0   | 0   | 0    | 0.00   | 0.00     |  |  |
|                        | 17 | 2     | 4  | 2    | 2.67  | 1.15     | 0   | 0  | 0    | 0.00  | 0.00     | 1   | 1   | 2    | 1.33   | 0.58     | 3   | 0   | 2    | 1.67   | 1.53     | 2   | 2   | 1    | 1.67   | 0.58     | 1   | 2   | 5    | 2.67   | 2.08     |  |  |
| 28                     | 2  | 4     | 2  | 2.67 | 1.15  | 0        | 0   | 0  | 0.00 | 0.00  | 1        | 1   | 4   | 2.00 | 1.73   | 3        | 0   | 3   | 2.00 | 1.73   | 3        | 3   | 3   | 3.00 | 0.00   | 1        | 4   | 11  | 5.33 | 5.13   |          |  |  |
| No. Shoots             | 0  | 2     | 5  | 6    | 4.33  | 2.08     | 4   | 4  | 2    | 3.33  | 1.15     | 2   | 2   | 2    | 2.00   | 0.00     | 2   | 2   | 2    | 2.00   | 0.00     | 2   | 0   | 2    | 1.33   | 1.15     | 6   | 6   | 2    | 4.67   | 2.31     |  |  |
|                        | 4  | 2     | 5  | 6    | 4.33  | 2.08     | 4   | 4  | 2    | 3.33  | 1.15     | 4   | 2   | 2    | 2.67   | 1.15     | 2   | 3   | 2    | 2.33   | 0.58     | 2   | 0   | 2    | 1.33   | 1.15     | 6   | 6   | 2    | 4.67   | 2.31     |  |  |
|                        | 7  | 2     | 5  | 6    | 4.33  | 2.08     | 4   | 6  | 4    | 4.67  | 1.15     | 4   | 2   | 2    | 2.67   | 1.15     | 2   | 3   | 2    | 2.33   | 0.58     | 2   | 0   | 2    | 1.33   | 1.15     | 6   | 6   | 2    | 4.67   | 2.31     |  |  |
|                        | 10 | 3     | 5  | 6    | 4.67  | 1.53     | 4   | 6  | 4    | 4.67  | 1.15     | 4   | 2   | 2    | 2.67   | 1.15     | 2   | 4   | 2    | 2.67   | 1.15     | 2   | 0   | 2    | 1.33   | 1.15     | 6   | 6   | 2    | 4.67   | 2.31     |  |  |
|                        | 17 | 4     | 5  | 6    | 5.00  | 1.00     | 4   | 6  | 4    | 4.67  | 1.15     | 5   | 2   | 2    | 3.00   | 1.73     | 2   | 4   | 2    | 2.67   | 1.15     | 2   | 0   | 2    | 1.33   | 1.15     | 6   | 6   | 2    | 4.67   | 2.31     |  |  |
|                        | 28 | 6     | 5  | 6    | 5.67  | 0.58     | 5   | 6  | 4    | 5.00  | 1.00     | 5   | 2   | 2    | 3.00   | 1.73     | 2   | 4   | 4    | 3.33   | 1.15     | 2   | 0   | 2    | 1.33   | 1.15     | 6   | 6   | 2    | 4.67   | 2.31     |  |  |

**Table S2.** Liquid culture system and plant growth regulator effects on shoot number in *R. officinalis*.

| Plant growth regulator |     | 6-BAP |     |     |     |     |        |          |      |     |    |    |    |       |          |      |    | NAA |    |    |       |          |      |     |     |     |     |        |          |      |    |    |    |     |       |          |      |      |     |    |      |       |          |      |      |  |  |  |  |  |  |
|------------------------|-----|-------|-----|-----|-----|-----|--------|----------|------|-----|----|----|----|-------|----------|------|----|-----|----|----|-------|----------|------|-----|-----|-----|-----|--------|----------|------|----|----|----|-----|-------|----------|------|------|-----|----|------|-------|----------|------|------|--|--|--|--|--|--|
| Concentration (mg/L)   |     | 0.2   |     |     |     |     |        |          |      | 2.5 |    |    |    |       |          |      |    | 5   |    |    |       |          |      |     |     | 0.5 |     |        |          |      |    |    |    | 1   |       |          |      |      |     |    |      | 2.5   |          |      |      |  |  |  |  |  |  |
|                        |     | 1A    | 1B  | 1C  | 1E  | 1D  | PROM.  | Desv Std | 2B   | 2A  | 2C | 2D | 2E | PROM. | Desv Std | 3A   | 3B | 3C  | 3E | 3D | PROM. | Desv Std | 4A   | 4B  | 4C  | 4D  | 4E  | PROM.  | Desv Std | 5A   | 5B | 5C | 5D | 5E  | PROM. | Desv Std | 6A   | 6B   | 6C  | 6D | 6E   | PROM. | Desv Std |      |      |  |  |  |  |  |  |
| % Contamination        | Day | 0     | 0   | 0   | 0   | 0   | 0.00   | 0.00     | 0    | 0   | 0  | 0  | 0  | 0.00  | 0.00     | 0    | 0  | 0   | 0  | 0  | 0.00  | 0.00     | 0    | 0   | 0   | 0   | 0   | 0.00   | 0.00     | 0    | 0  | 0  | 0  | 0   | 0.00  | 0.00     | 0    | 0    | 0   | 0  | 0    | 0.00  | 0.00     |      |      |  |  |  |  |  |  |
|                        | 0   | 0     | 0   | 0   | 0   | 0   | 0.00   | 0.00     | 0    | 0   | 0  | 0  | 0  | 0.00  | 0.00     | 0    | 0  | 0   | 0  | 0  | 0.00  | 0.00     | 0    | 0   | 0   | 0   | 0   | 0.00   | 0.00     | 0    | 0  | 0  | 0  | 0   | 0.00  | 0.00     | 0    | 0    | 0   | 0  | 0    | 0.00  | 0.00     |      |      |  |  |  |  |  |  |
|                        | 4   | 0     | 0   | 0   | 0   | 0   | 0.00   | 0.00     | 0    | 0   | 0  | 0  | 0  | 0.00  | 0.00     | 0    | 0  | 0   | 0  | 0  | 0.00  | 0.00     | 0    | 0   | 0   | 0   | 0   | 0.00   | 0.00     | 0    | 0  | 0  | 0  | 0   | 0.00  | 0.00     | 0    | 0    | 0   | 0  | 0    | 0.00  | 0.00     |      |      |  |  |  |  |  |  |
|                        | 7   | 0     | 0   | 0   | 0   | 0   | 0.00   | 0.00     | 0    | 0   | 0  | 0  | 0  | 0.00  | 0.00     | 0    | 0  | 0   | 0  | 0  | 0.00  | 0.00     | 0    | 0   | 0   | 0   | 0   | 0.00   | 0.00     | 0    | 0  | 0  | 0  | 0   | 0.00  | 0.00     | 0    | 0    | 0   | 0  | 0    | 0.00  | 0.00     |      |      |  |  |  |  |  |  |
|                        | 10  | 100   | 0   | 0   | 0   | 0   | 0.00   | 0.00     | 0    | 0   | 0  | 0  | 0  | 0.00  | 0.00     | 0    | 0  | 0   | 0  | 0  | 0.00  | 0.00     | 0    | 0   | 0   | 0   | 0   | 0.00   | 0.00     | 0    | 0  | 0  | 0  | 0   | 0.00  | 0.00     | 0    | 0    | 0   | 0  | 0    | 100   | 0.00     | 0.00 |      |  |  |  |  |  |  |
|                        | 17  | 100   | 0   | 0   | 0   | 0   | 0.00   | 0.00     | 0    | 0   | 0  | 0  | 0  | 0.00  | 0.00     | 0    | 0  | 0   | 0  | 0  | 0.00  | 0.00     | 0    | 0   | 0   | 0   | 0   | 0.00   | 0.00     | 0    | 0  | 0  | 0  | 0   | 0.00  | 0.00     | 0    | 0    | 0   | 0  | 0    | 100   | 0.00     | 0.00 |      |  |  |  |  |  |  |
|                        | 24  | 100   | 0   | 0   | 0   | 0   | 0.00   | 0.00     | 0    | 0   | 0  | 0  | 0  | 0.00  | 0.00     | 0    | 0  | 0   | 0  | 0  | 0.00  | 0.00     | 0    | 0   | 0   | 0   | 0   | 0.00   | 0.00     | 0    | 0  | 0  | 0  | 0   | 0.00  | 0.00     | 0    | 0    | 0   | 0  | 0    | 100   | 0.00     | 0.00 |      |  |  |  |  |  |  |
| % Necrosis             | 28  | 100   | 0   | 0   | 0   | 0   | 0.00   | 0.00     | 0    | 0   | 0  | 0  | 0  | 0.00  | 0.00     | 0    | 0  | 0   | 0  | 0  | 0.00  | 0.00     | 0    | 0   | 0   | 0   | 0   | 0.00   | 0.00     | 0    | 0  | 0  | 0  | 0   | 0.00  | 0.00     | 0    | 0    | 0   | 0  | 0    | 0     | 100      | 0.00 | 0.00 |  |  |  |  |  |  |
|                        | 42  | 100   | 0   | 0   | 0   | 0   | 0.00   | 0.00     | 0    | 0   | 0  | 0  | 0  | 0.00  | 0.00     | 0    | 0  | 0   | 0  | 0  | 0.00  | 0.00     | 0    | 0   | 0   | 0   | 0   | 0.00   | 0.00     | 0    | 0  | 0  | 0  | 0   | 0.00  | 0.00     | 0    | 0    | 0   | 0  | 0    | 100   | 0.00     | 0.00 |      |  |  |  |  |  |  |
|                        | 0   | 0     | 0   | 0   | 0   | 0   | 0.00   | 0.00     | 0    | 0   | 0  | 0  | 0  | 0.00  | 0.00     | 0    | 0  | 0   | 0  | 0  | 0.00  | 0.00     | 0    | 0   | 0   | 0   | 0   | 0.00   | 0.00     | 0    | 0  | 0  | 0  | 0   | 0.00  | 0.00     | 0    | 0    | 0   | 0  | 0    | 0     | 0.00     | 0.00 |      |  |  |  |  |  |  |
|                        | 4   | 0     | 1   | 5   | 25  | 1   | 10.33  | 12.86    | 1    | 5   | 0  | 5  | 5  | 3.33  | 2.89     | 1    | 10 | 5   | 1  | 5  | 5.33  | 4.51     | 15   | 95  | 5   | 10  | 5   | 36.67  | 50.58    | 1    | 1  | 0  | 1  | 10  | 0.67  | 0.58     | 1    | 0    | 1   | 1  | 5    | 0.67  | 0.58     |      |      |  |  |  |  |  |  |
|                        | 7   | 1     | 1   | 10  | 30  | 1   | 13.67  | 14.84    | 1    | 5   | 5  | 5  | 5  | 5.00  | 0.00     | 1    | 15 | 5   | 1  | 5  | 7.00  | 7.21     | 20   | 100 | 15  | 10  | 10  | 41.67  | 50.58    | 1    | 1  | 1  | 1  | 15  | 1.00  | 0.33     | 2.31 | 10   | 1   | 1  | 10   | 2.33  | 2.31     |      |      |  |  |  |  |  |  |
|                        | 10  | 1     | 5   | 25  | 100 | 1   | 43.33  | 50.08    | 5    | 10  | 10 | 5  | 5  | 8.33  | 2.89     | 5    | 15 | 5   | 1  | 5  | 8.33  | 5.77     | 20   | 100 | 15  | 10  | 10  | 41.67  | 50.58    | 1    | 1  | 1  | 1  | 15  | 1.00  | 0.00     | 10   | 1    | 1   | 15 | 4.00 | 5.20  |          |      |      |  |  |  |  |  |  |
|                        | 17  | ---   | 10  | 35  | 100 | 10  | 48.33  | 46.46    | 5    | 10  | 10 | 5  | 5  | 8.33  | 2.89     | 5    | 15 | 5   | 1  | 5  | 8.33  | 5.77     | 25   | 100 | 25  | 15  | 15  | 46.67  | 46.46    | 1    | 1  | 1  | 1  | 5   | 25    | 2.33     | 2.31 | 10   | 10  | 1  | 10   | ---   | 7.00     | 5.20 |      |  |  |  |  |  |  |
| No. Callus             | 24  | ---   | 75  | 95  | 100 | 75  | 90.00  | 13.23    | 45   | 60  | 25 | 10 | 5  | 31.67 | 25.66    | 50   | 40 | 20  | 5  | 10 | 36.67 | 15.28    | 50   | 100 | 70  | 50  | 60  | 73.33  | 25.17    | 5    | 65 | 20 | 40 | 75  | 41.67 | 22.55    | 30   | 75   | 20  | 30 | ---  | 41.67 | 29.30    |      |      |  |  |  |  |  |  |
|                        | 28  | ---   | 95  | 95  | 100 | 95  | 96.33  | 2.89     | 45   | 70  | 50 | 40 | 15 | 53.33 | 15.28    | 55   | 45 | 25  | 5  | 10 | 36.67 | 15.28    | 65   | 100 | 75  | 50  | 50  | 75.00  | 25.00    | 10   | 65 | 40 | 45 | 80  | 50.00 | 13.23    | 35   | 95   | 90  | 50 | ---  | 78.33 | 24.66    |      |      |  |  |  |  |  |  |
|                        | 42  | ---   | 100 | 100 | 100 | 100 | 100.00 | 0.00     | 65   | 90  | 70 | 50 | 15 | 70.00 | 20.00    | 90   | 65 | 50  | 5  | 10 | 68.33 | 20.21    | 100  | 100 | 100 | 100 | 100 | 100.00 | 0.00     | 15   | 95 | 75 | 80 | 100 | 81.67 | 7.64     | 70   | 100  | 100 | 75 | ---  | 91.67 | 14.43    |      |      |  |  |  |  |  |  |
|                        | 0   | 0     | 0   | 1   | 0   | 1   | 0.33   | 0.58     | 0    | 0   | 2  | 0  | 1  | 0.67  | 1.15     | 2    | 0  | 1   | 1  | 2  | 1.00  | 1.00     | 0    | 0   | 1   | 0   | 1   | 0.33   | 0.58     | 1    | 0  | 1  | 1  | 0   | 0.67  | 0.58     | 1    | 1    | 1   | 0  | 1    | 0     | 1        | 0.67 | 0.58 |  |  |  |  |  |  |
|                        | 4   | 0     | 0   | 1   | 0   | 1   | 0.33   | 0.58     | 0    | 0   | 1  | 0  | 1  | 0.33  | 0.58     | 2    | 0  | 1   | 1  | 2  | 1.00  | 1.00     | 0    | 0   | 1   | 0   | 1   | 0.33   | 0.58     | 1    | 1  | 1  | 3  | 0   | 1.67  | 1.15     | 1    | 1    | 1   | 0  | 1    | 0.67  | 0.58     |      |      |  |  |  |  |  |  |
|                        | 7   | 0     | 1   | 0   | 1   | 0   | 0.67   | 0.58     | 3    | 1   | 2  | 1  | 2  | 1     | 1.33     | 0.58 | 2  | 0   | 1  | 1  | 2     | 1.00     | 1.00 | 0   | 0   | 2   | 0   | 1      | 0.67     | 1.15 | 1  | 1  | 1  | 4   | 0     | 2.00     | 1.73 | 1    | 1   | 1  | 1    | 1     | 1        | 1.00 | 0.00 |  |  |  |  |  |  |
|                        | 10  | 0     | 1   | 0   | 1   | 0   | 1      | 0.67     | 0.58 | 3   | 1  | 2  | 2  | 2     | 1.67     | 0.58 | 3  | 1   | 1  | 2  | 2     | 1.67     | 1.15 | 0   | 0   | 2   | 1   | 1      | 1.00     | 1.00 | 1  | 1  | 1  | 4   | 0     | 2.00     | 1.73 | 1    | 1   | 2  | 1    | 2     | 1.33     | 0.58 |      |  |  |  |  |  |  |
| No. Shoots             | 17  | ---   | 1   | 1   | 0   | 1   | 0.67   | 0.58     | 3    | 1   | 2  | 3  | 2  | 2     | 2.00     | 1.00 | 3  | 2   | 2  | 2  | 2     | 2.33     | 0.58 | 0   | 0   | 2   | 1   | 1      | 1.00     | 1.00 | 1  | 1  | 4  | 8   | 0     | 4.33     | 3.51 | 1    | 2   | 2  | 2    | ---   | 2.00     | 0.00 |      |  |  |  |  |  |  |
|                        | 24  | ---   | 0   | 1   | 0   | 1   | 0.67   | 0.58     | 1    | 5   | 2  | 3  | 2  | 3.67  | 2.31     | 3    | 2  | 2   | 2  | 2  | 2.33  | 0.58     | 1    | 1   | 0   | 2   | 1   | 1      | 1.00     | 1.00 | 2  | 2  | 1  | 5   | 9     | 0        | 5.00 | 4.00 | 4   | 2  | 2    | 2     | ---      | 2.00 | 0.00 |  |  |  |  |  |  |
|                        | 28  | ---   | 1   | 1   | 0   | 1   | 0.67   | 0.58     | 3    | 1   | 5  | 2  | 2  | 2.67  | 2.31     | 3    | 2  | 2   | 2  | 2  | 2.33  | 0.58     | 1    | 0   | 2   | 1   | 1   | 1.00   | 1.00     | 2    | 2  | 1  | 5  | 9   | 0     | 5.00     | 4.00 | 4    | 2   | 2  | 2    | ---   | 2.00     | 0.00 |      |  |  |  |  |  |  |
|                        | 42  | ---   | 1   | 1   | 0   | 1   | 0.67   | 0.58     | 3    | 1   | 5  | 2  | 2  | 3.67  | 2.31     | 3    | 2  | 2   | 2  | 2  | 2.33  | 0.58     | 1    | 0   | 2   | 1   | 1   | 1.00   | 1.00     | 2    | 1  | 5  | 9  | 0   | 5.00  | 4.00     | 4    | 2    | 2   | 2  | ---  | 2.00  | 0.00     |      |      |  |  |  |  |  |  |
|                        | 0   | 3     | 2   | 4   | 2   | 6   | 2.67   | 1.15     | 6    | 2   | 7  | 6  | 6  | 6.67  | 2.31     | 7    | 2  | 2   | 2  | 2  | 3.33  | 2.31     | 2    | 2   | 2   | 2   | 2   | 2.00   | 0.00     | 6    | 6  | 6  | 6  | 6   | 6.67  | 0.58     | 7    | 2    | 4   | 4  | 12   | 3.33  | 1.15     |      |      |  |  |  |  |  |  |
|                        | 4   | 5     | 4   | 4   | 4   | 8   | 4.00   | 0.00     | 7    | 5   | 6  | 7  | 11 | 6.00  | 1.00     | 4    | 6  | 2   | 5  | 4  | 4.00  | 2.00     | 3    | 4   | 4   | 3   | 8   | 3.67   | 0.58     | 10   | 9  | 5  | 10 | 8   | 5.00  | 2.65     | 9    | 3    | 6   | 4  | 12   | 4.33  | 1.53     |      |      |  |  |  |  |  |  |
|                        | 7   | 6     | 4   | 6   | 6   | 10  | 5.33   | 1.15     | 8    | 8   | 6  | 10 | 15 | 8.00  | 2.00     | 6    | 6  | 6   | 6  | 6  | 6.00  | 0.00     | 5    | 5   | 5   | 6   | 9   | 5.33   | 0.58     | 12   | 10 | 5  | 14 | 5   | 9.67  | 4.51     | 11   | 3    | 6   | 5  | 14   | 4.67  | 1.53     |      |      |  |  |  |  |  |  |
| No. Shoots             | 10  | 6     | 4   | 6   | 6   | 10  | 5.33   | 1.15     | 11   | 8   | 8  | 14 | 15 | 10.00 | 3.46     | 6    | 6  | 6   | 6  | 6  | 6.00  | 0.00     | 5    | 5   | 5   | 6   | 9   | 5.67   | 0.58     | 13   | 10 | 8  | 14 | 5   | 10.67 | 3.06     | 13   | 4    | 6   | 5  | 14   | 5.00  | 1.00     |      |      |  |  |  |  |  |  |
|                        | 17  | ---   | 6   | 6   | 6   | 13  | 6.00   | 0.00     | 14   | 9   | 8  | 14 | 17 | 10.33 | 3.21     | 8    | 14 | 8   | 14 | 15 | 10.00 | 3.46     | 6    | 5   | 6   | 6   | 10  | 5.67   | 0.58     | 15   | 14 | 10 | 14 | 5   | 12.67 | 2.31     | 13   | 4    | 6   | 5  | ---  | 5.00  | 1.00     |      |      |  |  |  |  |  |  |
|                        | 24  | ---   | 6   | 6   | 6   | 13  | 6.00   | 0.00     | 22   | 13  | 14 | 17 | 18 | 14.67 | 2.08     | 14   | 16 | 14  | 18 | 19 | 14.67 | 1.15     | 7    | 5   | 6   | 6   | 10  | 5.67   | 0.58     | 17   | 16 | 10 | 14 | 6   | 13.33 | 3.06     | 13   | 6    | 6   | 8  | ---  | 6.67  | 1.15     |      |      |  |  |  |  |  |  |
|                        | 42  | ---   | 8   | 6   | 6   | 13  | 6.67   | 1.15     | 22   | 14  | 14 | 17 | 23 | 15.00 | 1.73     | 15   | 19 | 15  | 21 | 29 | 16.33 | 2.31     | 7    | 5   | 6   | 6   | 10  | 5.67   | 0.58     | 19   | 16 | 10 | 14 | 6   | 13.33 | 3.06     | 13   | 6    | 6   | 8  | ---  | 6.67  | 1.15     |      |      |  |  |  |  |  |  |

**Table S3.** Effects of immersion time and frequency on the contamination, necrosis, number of Callus and shoots.

| One Immersion every 24 HORAS |     |          |    |    |     |       |          |      |    |     |     |       |          |      |    |        |     |       |          |      |     |     |     |        |          |       |     |     |     |        |          |       |     |     |       |          |       |       |
|------------------------------|-----|----------|----|----|-----|-------|----------|------|----|-----|-----|-------|----------|------|----|--------|-----|-------|----------|------|-----|-----|-----|--------|----------|-------|-----|-----|-----|--------|----------|-------|-----|-----|-------|----------|-------|-------|
| Plant growth regulators      |     | 6-BAP    |    |    |     |       |          |      |    |     |     |       |          |      |    |        |     |       |          |      |     |     |     |        |          |       |     |     |     |        |          |       |     |     |       |          |       |       |
| Concentration (mg/L)         |     | 2.5 mg/L |    |    |     |       |          |      |    |     |     |       |          |      |    | 5 mg/L |     |       |          |      |     |     |     |        |          |       |     |     |     |        |          |       |     |     |       |          |       |       |
| Immersion time (min)         |     | 1        |    |    |     |       | 5        |      |    |     |     | 10    |          |      |    |        | 1   |       |          |      |     | 5   |     |        |          |       | 10  |     |     |        |          |       |     |     |       |          |       |       |
|                              | Day | 1A       | 1B | 1D | 1C  | PROM. | Desv std | 2B   | 2A | 2C  | 2D  | PROM. | Desv std | 3A   | 3B | 3C     | 3D  | PROM. | Desv std | 4B   | 4A  | 4C  | 4D  | PROM.  | Desv std | 5B    | 5A  | 5C  | 5D  | PROM.  | Desv std | 6A    | 6B  | 6D  | PROM. | Desv std |       |       |
| % Contamination              | 0   | 0        | 0  | 0  | 0   | 0.00  | 0.00     | 0    | 0  | 0   | 0   | 0.00  | 0.00     | 0    | 0  | 0      | 0   | 0.00  | 0.00     | 0    | 0   | 0   | 0   | 0.00   | 0.00     | 0     | 0   | 0   | 0   | 0.00   | 0.00     | 0     | 0   | 0   | 0     | 0.00     | 0.00  |       |
|                              | 5   | 0        | 0  | 0  | 0   | 0.00  | 0.00     | 0    | 0  | 0   | 0   | 0.00  | 0.00     | 100  | 0  | 0      | 0   | 0.00  | 0.00     | 100  | 0   | 0   | 0   | 0.00   | 0.00     | 0     | 0   | 0   | 0   | 0.00   | 0.00     | 0     | 0   | 0   | 0     | 0.00     | 0.00  |       |
|                              | 34  | 0        | 0  | 0  | 0   | 0.00  | 0.00     | 0    | 0  | 0   | 0   | 0.00  | 0.00     | 100  | 0  | 0      | 0   | 0.00  | 0.00     | 100  | 0   | 0   | 0   | 0.00   | 0.00     | 0     | 0   | 0   | 0   | 0.00   | 0.00     | 0     | 0   | 0   | 0     | 0.00     | 0.00  |       |
|                              | 48  | 0        | 0  | 0  | 0   | 0.00  | 0.00     | 0    | 0  | 0   | 0   | 0.00  | 0.00     |      | 0  | 0      | 0   | 0.00  | 0.00     | 100  | 0   | 0   | 0   | 0.00   | 0.00     | 0     | 0   | 0   | 0   | 0.00   | 0.00     | 0     | 0   | 0   | 0     | 0.00     | 0.00  |       |
| % Necrosis                   | 70  | 0        | 0  | 0  | 0   | 0.00  | 0.00     | 0    | 0  | 0   | 0   | 0.00  | 0.00     |      | 0  | 0      | 0   | 0.00  | 0.00     | 100  | 0   | 0   | 0   | 0.00   | 0.00     | 0     | 0   | 0   | 0   | 0.00   | 0.00     | 0     | 0   | 0   | 0     | 0.00     | 0.00  |       |
|                              | 0   | 0        | 0  | 1  | 2   | 1     | 1.00     | 1.00 | 0  | 0   | 0   | 8     | 2.50     | 4.33 | 0  | 0      | 0   | 0     | 0.00     | 0.00 |     | 28  | 3   | 28     | 19.67    | 14.43 | 0   | 0   | 27  | 6      | 11.00    | 14.18 | 0   | 20  | 10    | 0        | 10.00 | 10.00 |
|                              | 5   | 1        | 2  | 2  | 2   | 1.53  | 0.50     | 0    | 2  | 0   | 60  | 20.50 | 34.22    | 60   | 0  | 1      | 75  | 25.33 | 43.02    |      | 45  | 5   | 63  | 37.67  | 29.69    | 1     | 25  | 77  | 6   | 36.00  | 36.76    | 1     | 35  | 100 | 0     | 45.33    | 50.30 |       |
|                              | 34  | 2        | 3  | 5  | 100 | 3.33  | 1.53     | 4    | 15 | 100 | 90  | 68.33 | 46.46    |      | 3  | 100    | 100 | 67.67 | 56.00    |      | 88  | 100 | 100 | 96.00  | 6.93     | 11    | 100 | 95  | 66  | 87.00  | 18.36    | 15    | 100 | 100 | 2     | 71.67    | 49.07 |       |
| No. of Callus                | 48  | 2        | 4  | 6  | 100 | 4.00  | 2.00     | 6    | 22 | 100 | 90  | 70.67 | 42.44    |      | 4  | 100    | 100 | 68.00 | 55.43    |      | 100 | 100 | 100 | 100.00 | 0.00     | 12    | 100 | 100 | 100 | 100.00 | 0.00     | 15    | 100 | 100 | 3     | 71.67    | 49.07 |       |
|                              | 70  | 7        | 6  | 6  | 100 | 6.33  | 0.58     | 6    | 54 | 100 | 100 | 84.67 | 26.56    |      | 17 | 100    | 100 | 72.33 | 47.92    |      | 100 | 100 | 100 | 100.00 | 0.00     | 88    | 100 | 100 | 100 | 100.00 | 0.00     | 100   | 100 | 100 | 6     | 100.00   | 0.00  |       |
|                              | 0   | 0        | 0  | 0  | 0   | 0.00  | 0.00     | 0    | 0  | 0   | 0   | 0.00  | 0.00     |      | 0  | 0      | 0   | 0.00  | 0.00     |      | 0   | 0   | 0   | 0.00   | 0.00     | 0     | 0   | 0   | 0   | 0.00   | 0.00     | 0     | 0   | 0   | 0     | 0.00     | 0.00  |       |
|                              | 5   | 1        | 0  | 0  | 0   | 0.33  | 0.58     | 1    | 0  | 0   | 0   | 0.00  | 0.00     |      | 0  | 0      | 0   | 0.00  | 0.00     |      | 0   | 0   | 0   | 0.00   | 0.00     | 1     | 0   | 0   | 0   | 0.00   | 0.00     | 1     | 0   | 0   | 0     | 0.33     | 0.58  |       |
| No. of Shoots                | 34  | 4        | 1  | 3  | 0   | 2.67  | 1.53     | 2    | 1  | 0   | 0   | 0.33  | 0.58     |      | 2  | 0      | 0   | 0.67  | 1.15     |      | 1   | 2   | 0   | 1.00   | 1.00     | 1     | 2   | 0   | 1   | 1.00   | 1.00     | 1     | 0   | 0   | 1     | 0.33     | 0.58  |       |
|                              | 48  | 4        | 2  | 3  | 0   | 3.00  | 1.00     | 4    | 2  | 0   | 0   | 0.67  | 1.15     |      | 2  | 0      | 0   | 0.67  | 1.15     |      | 1   | 2   | 0   | 1.00   | 1.00     | 1     | 2   | 0   | 1   | 1.00   | 1.00     | 1     | 0   | 0   | 1     | 0.33     | 0.58  |       |
|                              | 70  | 4        | 3  | 3  | 0   | 3.33  | 0.58     | 5    | 2  | 0   | 0   | 0.67  | 1.15     |      | 2  | 0      | 0   | 0.67  | 1.15     |      | 1   | 2   | 0   | 1.00   | 1.00     | 1     | 2   | 0   | 2   | 1.33   | 1.15     | 1     | 0   | 0   | 1     | 0.33     | 0.58  |       |
|                              | 0   | 7        | 9  | 8  | 6   | 8.00  | 1.00     | 6    | 10 | 2   | 4   | 5.33  | 4.16     | 2    | 4  | 6      | 2   | 4.00  | 2.00     | 3    | 4   | 2   | 4   | 3.33   | 1.15     | 6     | 2   | 6   | 6   | 4.67   | 2.31     | 6     | 4   | 1   | 5     | 3.67     | 2.52  |       |
| No. of Shoots                | 5   | 7        | 12 | 8  | 6   | 9.00  | 2.65     | 6    | 10 | 4   | 8   | 7.33  | 3.06     | 2    | 4  | 12     | 2   | 6.00  | 5.29     | 3    | 4   | 2   | 4   | 3.33   | 1.15     | 12    | 2   | 6   | 6   | 4.67   | 2.31     | 6     | 4   | 1   | 6     | 3.67     | 2.52  |       |
|                              | 34  | 13       | 47 | 23 | 12  | 27.67 | 17.47    | 26   | 23 | 12  | 15  | 16.67 | 5.69     |      | 28 | 18     | 12  | 19.33 | 8.08     |      | 4   | 2   | 4   | 3.33   | 1.15     | 51    | 2   | 6   | 8   | 5.33   | 3.06     | 16    | 4   | 1   | 28    | 7.00     | 7.94  |       |
|                              | 48  | 26       | 73 | 86 | 12  | 61.67 | 31.56    | 67   | 33 | 19  | 26  | 26.00 | 7.00     |      | 43 | 23     | 25  | 30.33 | 11.02    |      | 4   | 2   | 4   | 3.33   | 1.15     | 60    | 2   | 6   | 8   | 5.33   | 3.06     | 16    | 4   | 1   | 52    | 7.00     | 7.94  |       |
|                              | 70  | 94       | 99 | 95 | 12  | 96.00 | 2.65     | 76   | 33 | 28  | 35  | 32.00 | 3.61     |      | 50 | 35     | 38  | 41.00 | 7.94     |      | 4   | 2   | 4   | 3.33   | 1.15     | 60    | 2   | 6   | 8   | 5.33   | 3.06     | 16    | 4   | 1   | 101   | 7.00     | 7.94  |       |

| One Immersion every 12 HORAS |     |          |     |    |     |       |          |     |     |    |     |       |          |     |     |        |     |       |          |     |     |     |     |        |          |     |     |     |       |       |          |     |     |     |      |        |          |
|------------------------------|-----|----------|-----|----|-----|-------|----------|-----|-----|----|-----|-------|----------|-----|-----|--------|-----|-------|----------|-----|-----|-----|-----|--------|----------|-----|-----|-----|-------|-------|----------|-----|-----|-----|------|--------|----------|
| Plant growth regulators      |     | 6-BAP    |     |    |     |       |          |     |     |    |     |       |          |     |     |        |     |       |          |     |     |     |     |        |          |     |     |     |       |       |          |     |     |     |      |        |          |
| Concentration (mg/L)         |     | 2.5 mg/L |     |    |     |       |          |     |     |    |     |       |          |     |     | 5 mg/L |     |       |          |     |     |     |     |        |          |     |     |     |       |       |          |     |     |     |      |        |          |
| Immersion time (min)         |     | 1        |     |    |     | 5     |          |     |     | 10 |     |       |          | 1   |     |        |     | 5     |          |     |     | 10  |     |        |          |     |     |     |       |       |          |     |     |     |      |        |          |
|                              | Day | 7A       | 7B  | 7C | 7D  | PROM. | Desv std | 8A  | 8B  | 8C | 8D  | PROM. | Desv std | 9A  | 9C  | 9B     | 9D  | PROM. | Desv std | 10C | 10B | 10D | 10A | PROM.  | Desv std | 11B | 11C | 11A | 11D   | PROM. | Desv std | 12C | 12A | 12B | 12D  | PROM.  | Desv std |
| % Contamination              | 0   | 0        | 0   | 0  | 0   | 0.00  | 0.00     | 0   | 0   | 0  | 0   | 0.00  | 0.00     | 0   | 0   | 0      | 0   | 0.00  | 0.00     | 0   | 0   | 0   | 0   | 0.00   | 0.00     | 0   | 0   | 0   | 0     | 0.00  | 0.00     | 0   | 0   | 0   | 0    | 0.00   | 0.00     |
|                              | 5   | 0        | 0   | 0  | 0   | 0.00  | 0.00     | 0   | 0   | 0  | 0   | 0.00  | 0.00     | 0   | 0   | 0      | 0   | 0.00  | 0.00     | 0   | 0   | 0   | 0   | 0.00   | 0.00     | 100 | 0   | 0   | 0     | 0.00  | 0.00     | 100 | 0   | 0   | 0    | 0.00   | 0.00     |
|                              | 34  | 0        | 0   | 0  | 0   | 0.00  | 0.00     | 0   | 0   | 0  | 0   | 0.00  | 0.00     | 0   | 0   | 0      | 100 | 0.00  | 0.00     | 0   | 0   | 0   | 0   | 0.00   | 0.00     | 100 | 0   | 0   | 0     | 0.00  | 0.00     |     | 0   | 0   | 0    | 0.00   | 0.00     |
|                              | 48  | 0        | 0   | 0  | 0   | 0.00  | 0.00     | 0   | 0   | 0  | 0   | 0.00  | 0.00     | 0   | 0   | 0      |     | 0.00  | 0.00     | 0   | 0   | 0   | 0   | 0.00   | 0.00     |     | 0   | 0   | 0     | 0.00  | 0.00     |     | 0   | 0   | 0    | 0.00   | 0.00     |
| % Necrosis                   | 70  | 0        | 0   | 0  | 0   | 0.00  | 0.00     | 0   | 0   | 0  | 0   | 0.00  | 0.00     | 0   | 0   | 0      |     | 0.00  | 0.00     | 0   | 0   | 0   | 0   | 0.00   | 0.00     |     | 0   | 0   | 0     | 0.00  | 0.00     |     | 0   | 0   | 0    | 0.00   | 0.00     |
|                              | 0   | 2        | 0   | 4  | 0   | 2.00  | 2.00     | 50  | 20  | 4  | 8   | 24.67 | 23.35    | 13  | 0   | 20     | 0   | 11.00 | 10.15    | 8   | 0   | 0   | 0   | 0.00   | 0.00     | 10  | 20  | 0   | 0     | 6.67  | 11.55    | 0   | 56  | 7   | 0    | 21.00  | 30.51    |
|                              | 5   | 3        | 1   | 11 | 0   | 5.00  | 5.29     | 83  | 30  | 12 | 23  | 41.67 | 36.91    | 13  | 0   | 50     | 82  | 21.00 | 25.94    | 40  | 1   | 0   | 0   | 0.17   | 0.29     | 30  | 20  | 1   | 0     | 7.00  | 11.27    | 0   | 100 | 7   | 0    | 35.67  | 55.82    |
|                              | 34  | 6        | 40  | 77 | 5   | 41.00 | 35.51    | 100 | 100 | 60 | 98  | 86.67 | 23.09    | 36  | 5   | 50     | 82  | 30.33 | 23.03    | 100 | 7   | 1   | 1   | 3.00   | 3.46     |     | 93  | 4   | 43    | 46.67 | 44.61    | 9   | 100 | 83  | 100  | 94.33  | 9.81     |
| No. of Callus                | 48  | 11       | 78  | 85 | 7   | 58.00 | 40.85    | 100 | 100 | 80 | 100 | 93.33 | 11.55    | 40  | 5   | 50     |     | 31.67 | 23.63    | 100 | 9   | 1   | 2   | 4.00   | 4.36     |     | 100 | 4   | 43    | 49.00 | 48.28    | 33  | 100 | 100 | 100  | 100.00 | 0.00     |
|                              | 70  | 12       | 100 | 85 | 7   | 65.67 | 47.08    | 100 | 100 | 80 | 100 | 93.33 | 11.55    | 100 | 5   | 50     |     | 51.67 | 47.52    | 100 | 10  | 2   | 2   | 4.67   | 4.62     |     | 100 | 4   | 43    | 49.00 | 48.28    | 100 | 100 | 100 | 100  | 100.00 | 0.00     |
|                              | 0   | 0        | 0   | 0  | 0   | 0.00  | 0.00     | 0   | 0   | 0  | 0   | 0.00  | 0.00     | 0   | 0   | 0      | 0   | 0.00  | 0.00     | 0   | 0   | 0   | 0   | 0.00   | 0.00     | 0   | 0   | 0   | 0     | 0.00  | 0.00     | 0   | 0   | 0   | 0    | 0.00   | 0.00     |
|                              | 5   | 0        | 0   | 0  | 0   | 0.00  | 0.00     | 0   | 0   | 0  | 0   | 0.00  | 0.00     | 0   | 0   | 0      | 0   | 0.00  | 0.00     | 0   | 0   | 0   | 0   | 0.00   | 0.00     | 1   | 1   | 0   | 1     | 0.67  | 0.58     | 1   | 0   | 0   | 1    | 0.33   | 0.58     |
| No. of Shoots                | 34  | 2        | 2   | 2  | 1   | 2.00  | 0.00     | 2   | 0   | 2  | 1   | 1.33  | 1.15     | 3   | 8   | 0      | 0   | 3.67  | 4.04     | 1   | 2   | 1   | 2   | 1.67   | 0.58     |     | 2   | 1   | 2     | 1.67  | 0.58     | 2   | 0   | 2   | 2    | 1.33   | 1.15     |
|                              | 48  | 2        | 2   | 2  | 1   | 2.00  | 0.00     | 2   | 0   | 2  | 1   | 1.33  | 1.15     | 3   | 8   | 0      |     | 3.67  | 4.04     | 2   | 5   | 2   | 5   | 4.00   | 1.73     |     | 3   | 1   | 3     | 2.33  | 1.15     | 2   | 0   | 2   | 2    | 1.33   | 1.15     |
|                              | 70  | 2        | 4   | 2  | 1   | 2.67  | 1.15     | 2   | 0   | 2  | 1   | 1.33  | 1.15     | 3   | 8   | 0      |     | 3.67  | 4.04     | 2   | 5   | 2   | 5   | 4.00   | 1.73     |     | 3   | 1   | 3     | 2.33  | 1.15     | 2   | 0   | 2   | 2    | 1.33   | 1.15     |
|                              | 0   | 5        | 4   | 7  | 10  | 5.33  | 1.53     | 4   | 2   | 5  | 6   | 3.67  | 1.53     | 4   | 6   | 4      | 6   | 4.67  | 1.15     | 2   | 6   | 4   | 4   | 4.67   | 1.15     | 2   | 2   | 4   | 4     | 3.33  | 1.15     | 7   | 5   | 6   | 6    | 5.67   | 0.58     |
| No. of Shoots                | 5   | 5        | 4   | 7  | 10  | 5.33  | 1.53     | 4   | 2   | 5  | 6   | 3.67  | 1.53     | 4   | 6   | 4      | 6   | 4.67  | 1.15     | 2   | 6   | 4   | 4   | 4.67   | 1.15     | 2   | 2   | 4   | 4     | 3.33  | 1.15     | 7   | 5   | 6   | 6    | 5.67   | 0.58     |
|                              | 34  | 33       | 5   | 7  | 64  | 15.00 | 15.62    | 4   | 2   | 5  | 6   | 3.67  | 1.53     | 10  | 24  | 10     |     | 14.67 | 8.08     | 2   | 50  | 62  | 91  | 67.67  | 21.08    | 2   | 4   | 7   | 4.33  | 2.52  | 51       | 5   | 6   | 6   | 5.67 | 0.58   |          |
|                              | 48  | 33       | 5   | 8  | 139 | 15.33 | 15.37    | 4   | 2   | 5  | 6   | 3.67  | 1.53     | 12  | 54  | 12     |     | 26.00 | 24.25    | 2   | 97  | 148 | 143 | 129.33 | 28.11    | 2   | 12  | 7   | 7.00  | 5.00  | 71       | 5   | 6   | 6   | 5.67 | 0.58   |          |
|                              | 70  | 33       | 7   | 8  | 139 | 16.00 | 14.73    | 4   | 2   | 5  | 6   | 3.67  | 1.53     | 14  | 118 | 16     |     | 49.33 | 59.48    | 2   | 146 | 203 | 162 | 170.33 | 29.40    | 2   | 57  | 7   | 22.00 | 30.41 | 91       | 5   | 6   | 6   | 5.67 | 0.58   |          |

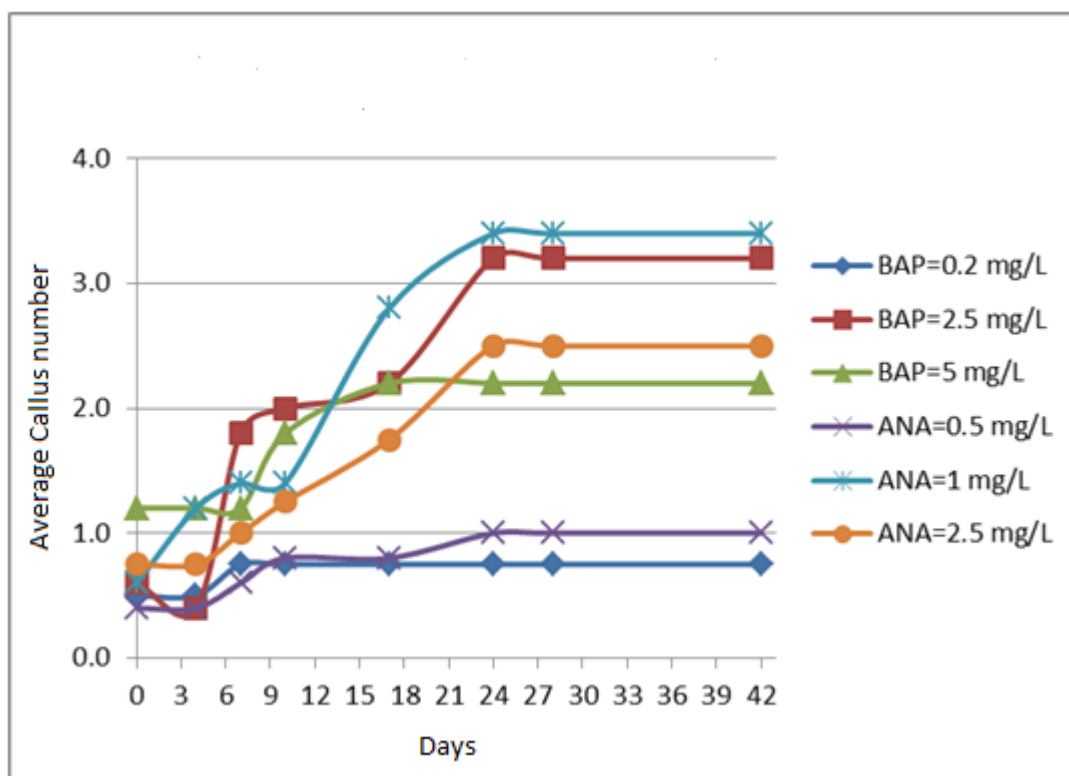

**Figure S3.** Effect of 6-BAP and NAA on callus induction in *R. officinalis* explants versus days of cultivation.

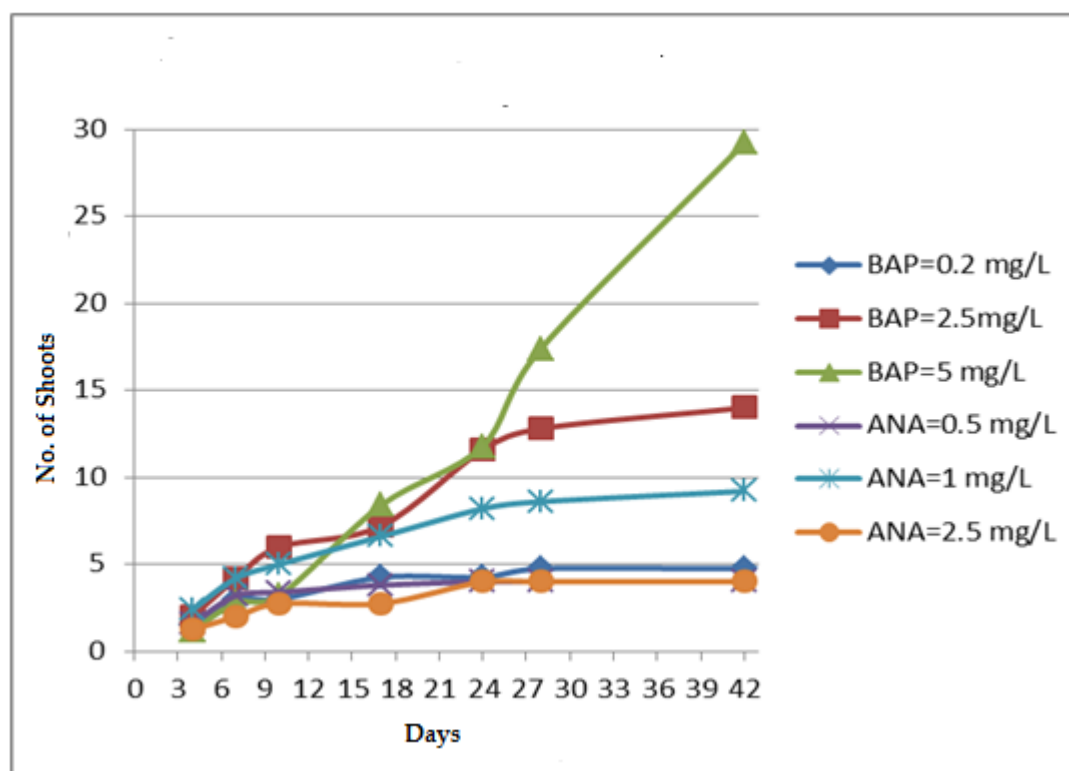

**Figure S4.** Effect of 6-BAP and NAA on number of shoots in *R. officinalis* explants versus days of cultivation.

### Thin-layer chromatography

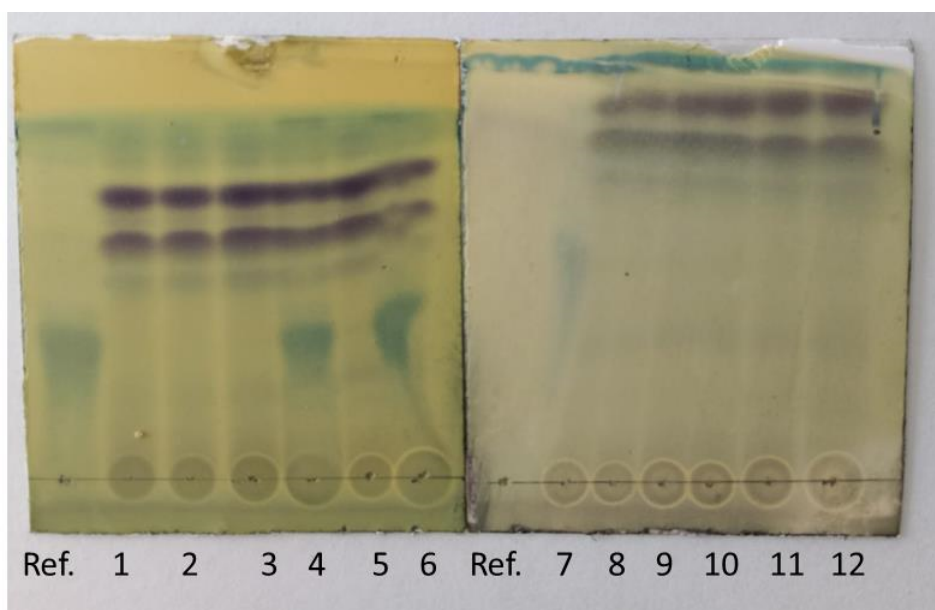

**Figure S5.** Thin-layer chromatography (TLC, SiO<sub>2</sub>) of acetonic extracts of callus samples from fractions 1-12 (Table 1) developed with dichloromethane: acetone (95:5) and revealed with oleum (80% acetic acid, 16% water, 4% sulphuric acid).

### HPLC chromatogram

**Table S4.** Validation parameters for the determination of carnosol by HPLC-DAD.

| Validation parameters                     | Results                |
|-------------------------------------------|------------------------|
| Wavelength (nm)                           | 293                    |
| Linearity range (µg / mL)                 | 150-385                |
| Retention time (min)                      | 10.7                   |
| Calibration equation                      | y= 0.005x + 0.0256     |
| Correlation coefficient (R <sup>2</sup> ) | 0.9894                 |
| Standard deviation of the intercept       | 3.0 x 10 <sup>-4</sup> |
| Standard deviation of the slope           | 0.0256                 |
| Limit of detection (µg/mL)                | 3.68                   |
| Limit of quantification (µg/mL)           | 12.62                  |

**Table S5.** Influence of the flow of the mobile on retention time ( $t_R$ ), dead time ( $t_0$ ) and retention factors ( $k'$ ).

| Flow (mL/min) | Retention time (min) | Dead time (min) | Retention factors |
|---------------|----------------------|-----------------|-------------------|
| 1.0           | 14.81                | 2.513           | 4.89              |
| 1.1           | 13.44                | 2.293           | 4.86              |
| 1.2           | 10.74                | 2.680           | 3.01              |
| 1.5           | 11.32                | 2.147           | 4.27              |

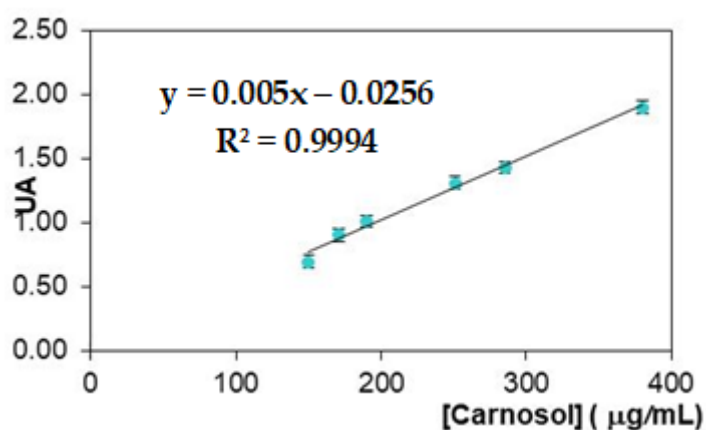

**Figure S6.** Calibration Curve for carnosol. Six different concentrations of carnosol ( $n= 3$ ) were prepared from the standard solution. 20  $\mu$ L of each concentration were injected and response was measured at 293 nm to plot calibration curve.

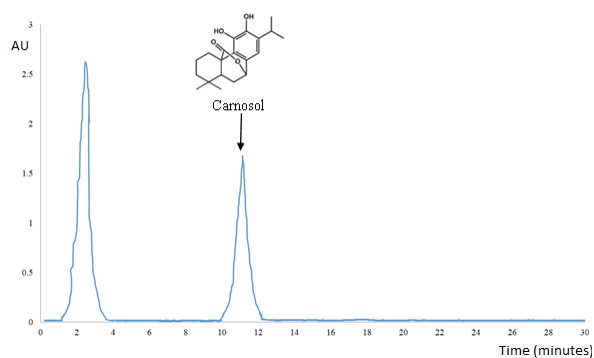

**Figure S7.** Chromatogram of carnosol at 370  $\mu$ g mL<sup>-1</sup>. Chromatography conditions: flow at 1.2 mL min<sup>-1</sup>; isocratic elution, 60-40% 10 mM formic (pH 3) - CH<sub>3</sub>CN (v/v); the injection volume was 20  $\mu$ L, and the wavelength of the detector was set at 293 nm.

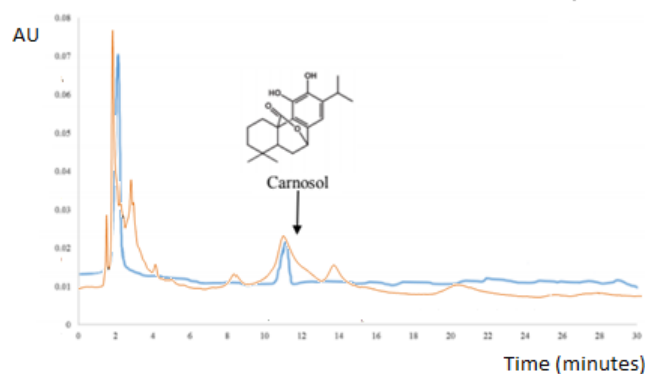

**Figure S8.** Chromatogram of the Carnosol standard at 220 mg mL<sup>-1</sup> (blue line) vs chromatogram of a sample of *R. officinalis* acetonetic extract (orange line). Chromatography conditions: flow at 1.2 mL min<sup>-1</sup>; isocratic elution, 60-40% 10 mM formic (pH 3) - CH<sub>3</sub>CN (v/v); the injection volume was 20 µL, and the wavelength of the detector was set at 293 nm.

Chromatogram of carnosol at 370 µg mL<sup>-1</sup>. Chromatography conditions: flow at 1.2 mL min<sup>-1</sup>; isocratic elution, 60-40% 10 mM formic (pH 3) - CH<sub>3</sub>CN (v/v); the injection volume was 20 µL, and the wavelength of the detector was set at 293 nm.

|  |  |  |  |
|--|--|--|--|
|  |  |  |  |
|  |  |  |  |

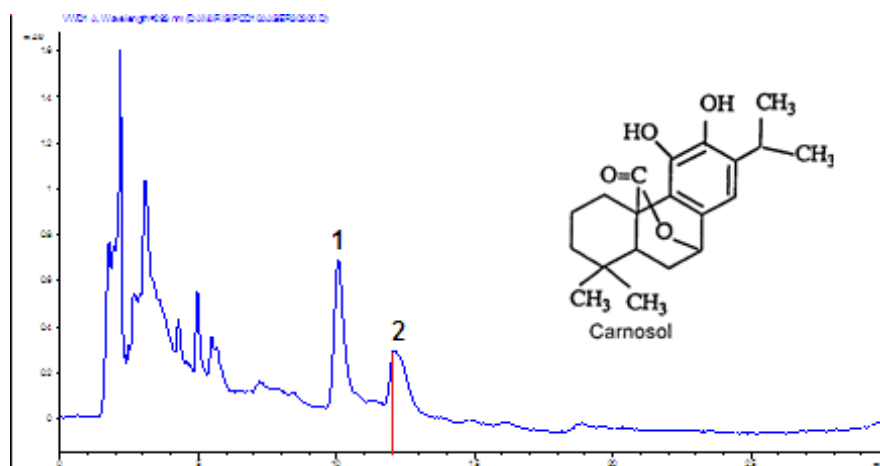

**Figure S9.** Characteristic HPLC profile of the acetonetic extract of a callus sample of *R. officinalis* (media supplemented with 6- BAP; Table 3, entries 1 and 4). Peak 1, carnosol; Peak 2, undefined.

Chromatography conducted using Hypersil ODS C18 (250mm x 4.6 mm, 5  $\mu$ m particle size) column; flow at 1.2 mL/min; isocratic elution, 60-40% 10 mM formic (pH 3) - CH<sub>3</sub>CN (v/v) as mobile phase which was filtered and degassed before analysis; Retention times (r.t) in min correspond to the analysis at 25°C; the injection volume was 20  $\mu$ L, and the wavelength of the detector was set at 254 and 293 nm.
